# Supplementary material
Source: MDPI journal article supplement (https://www.mdpi.com/2076-3417/13/4/2590)
Supplement: s1 [file s1]

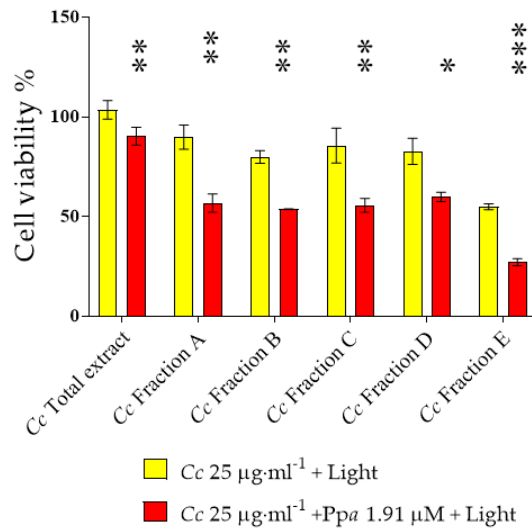

**Figure S1:** Activity of Pheophorbide *a* (Ppa) and *Cylindrotheca closterium* (Cc) extract against normal human keratinocyte (HaCat). Results are expressed as percent survival after 24 h exposure followed by 1 h photo-activation (\*  $p<0.05$ ; \*\*  $p<0.01$ ; \*\*\*  $p<0.001$ ).

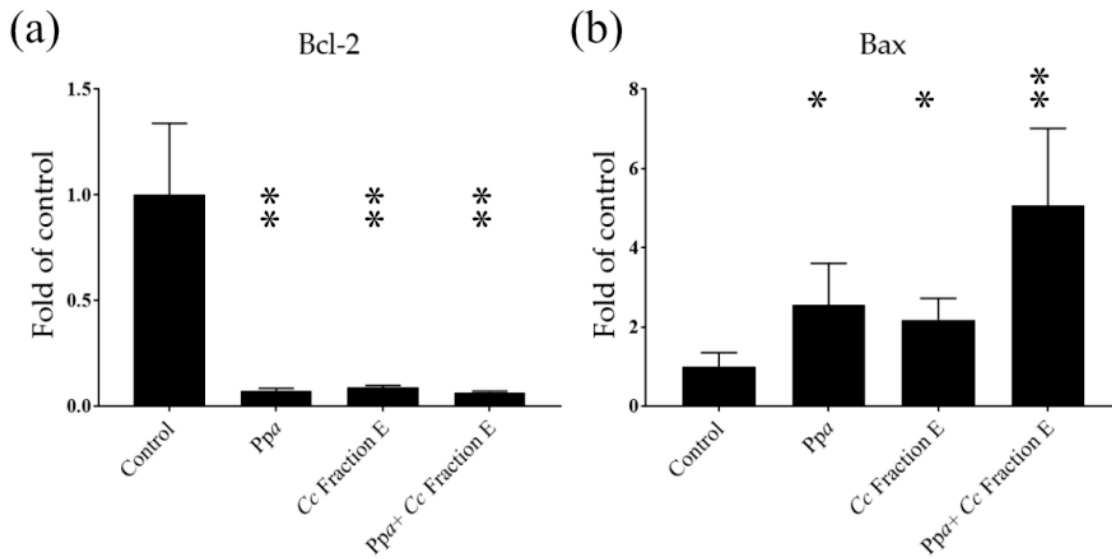

**Figure S2:** The intensity of the bands of immunodetected Bcl-2 and Bax were normalized with glyceraldehyde 3-phosphate dehydrogenase (GAPDH). (\* $p < 0.05$ ; \*\* $p < 0.01$ ).
