# Supplementary material
Source: MDPI journal article supplement (https://www.mdpi.com/2076-3417/13/4/2590)
Supplement: s1 [file s1 › Supplementary Table S1.xlsx]

## Sheet: Foglio1
Cell Lines	Samples	Cell viability (%)
HepG2		Microalgae 50 µg/mL + Pheophorbide a 10 µg/mL	Microalgae 25 µg/mL + Pheophorbide a 10 µg/mL	Microalgae 25 µg/mL + Pheophorbide a 5 µg/mL	Pheophorbide a 10 µg/mL
	Asterionellopsis glacialis (RCC1712)	80	99	92	85
	Chlamydomonas sp. (CCMP2536)	86	100	82
	Chlamydomonas sp. (CCMP225)	84	100	73
	Cylindrotheca closterium	100	100	66
	Dunaliella tertiolecta	89	100	80
	Dtylum brightwellii (CCMP1320)	100	100	100
	Trieres mobiliensis	100	100	100
	Pseudo-nitzchia arenysensis	51	73	47
	Pseudo-nitzchia fraudulenta	42	60	44
	Rhinomonas reticulata (CCAP995/2)	62	100	60
	Scripsiella acuminata	86	100	82
A2058
	Asterionellopsis glacialis (RCC1712)	41	45	50	63
	Chlamydomonas sp. (CCMP2536)	54	57	87
	Chlamydomonas sp. (CCMP225)	63	93	100
	Cylindrotheca closterium	32	46	46
	Dunaliella tertiolecta	63	75	100
	Dytilum brightwellii (CCMP1320)	47	54	62
	Trieres mobiliensis	46	50	62
	Pseudo-nitzchia arenysensis	76	88	100
	Pseudo-nitzchia fraudulenta	69	60	66
	Rhinomonas reticulata (CCAP995/2)	69	94	100
	Scripsiella acuminata	69	100	100
JJN3
	Asterionellopsis glacialis (RCC1712)	47	51	72	70
	Chlamydomonas sp. (CCMP2536)	63	66	69
	Chlamydomonas sp. (CCMP225)	69	75	79
	Cylindrotheca closterium	72	70	66
	Dunaliella tertiolecta	82	81	97
	Dytilum brightwellii (CCMP1320)	44	52	80
	Trieres mobiliensis	56	52	87
	Pseudo-nitzchia arenysensis	61	62	69
	Pseudo-nitzchia fraudulenta	75	66	80
	Rhinomonas reticulata (CCAP995/2)	64	61	68
	Scripsiella acuminata	62	61	63
